# Supplementary material for: Recuperation of nitrogen cycling in Amazonian forests following agricultural abandonment
Source: Springer Nature journal article supplement (doi:10.1038/nature05900), 2007-06-01
Supplement: 41586_2007_BFnature05900_MOESM458_ESM.pdf [file 41586_2007_BFnature05900_MOESM458_ESM.pdf]

## 1 Supplemental Information:

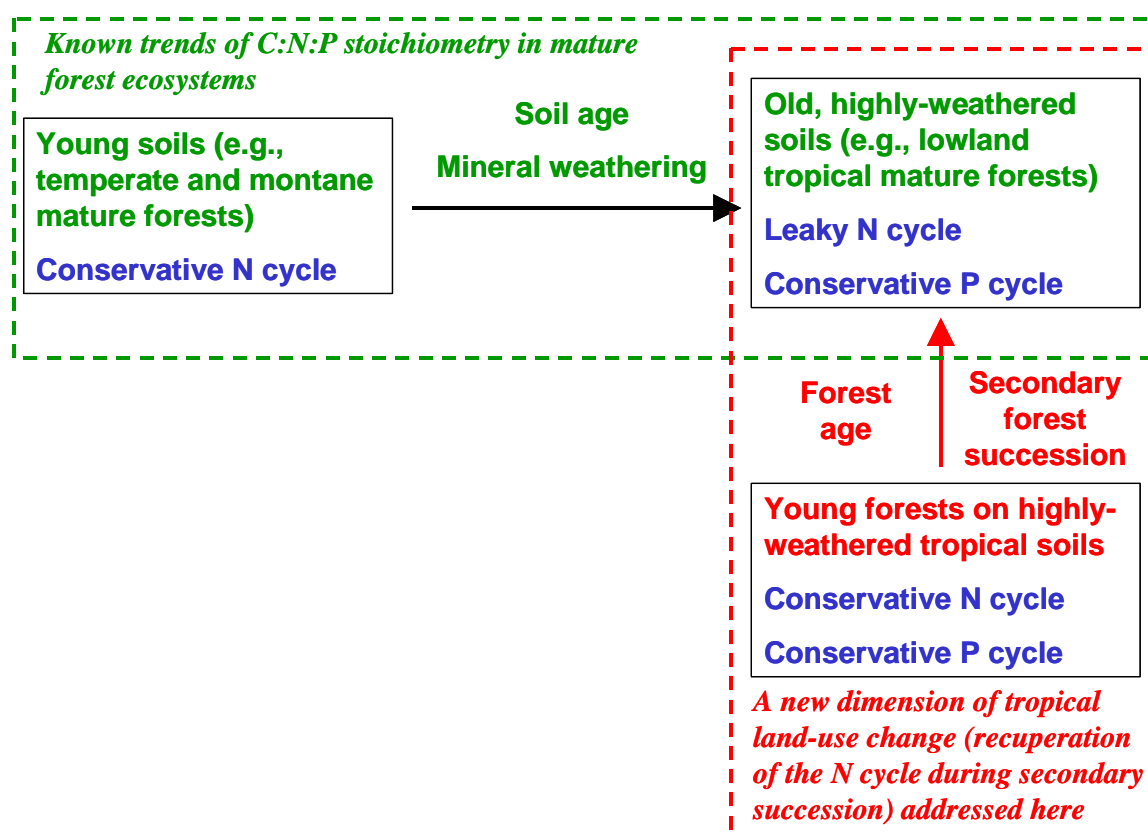

2

3 **Figure S1. Simple schematic that summarizes the main finding of the paper.** The patterns of  
 4 N and P cycling for secondary succession, shown here in red font, are integrated conceptually  
 5 with those previously demonstrated for primary succession, shown here in green font. Actively  
 6 cycling N in terrestrial ecosystems can be lost either by land-use change, such as forest clearing,  
 7 burning and agricultural practices (the present study), or by natural processes such as fires,  
 8 landslides, glaciers, and volcanic activity (previous studies). Just as accumulation of total  
 9 ecosystem N alleviates a N limitation as soils age over thousands and millions of years, we show  
 10 here that actively cycling N accumulates over decades and centuries during secondary forest  
 11 succession, resulting in a similar successional trajectory from a conservative N cycle following  
 12 agricultural abandonment to the leaky-N and conservative-P cycles expected in mature lowland  
 13 tropical forests on old soils.

14 **Table S1.** Physical and chemical characteristics of the top 10 cm of mineral soil of São  
 15 Francisco do Pará (SF), Capitão Poço (CP) and Paragominas (PG) chronosequences.

| Site & Age<br>(years) | Bulk density<br>(g cm <sup>-3</sup> ) | Clay<br>(g kg <sup>-1</sup> ) | Sand<br>(g kg <sup>-1</sup> ) | pH <sub>H2O</sub> | C<br>(g.kg <sup>-1</sup> ) | N<br>(g.kg <sup>-1</sup> ) | P <sub>Mehlich</sub><br>(mg kg <sup>-1</sup> ) | P <sub>total</sub><br>(mg kg <sup>-1</sup> ) |
|-----------------------|---------------------------------------|-------------------------------|-------------------------------|-------------------|----------------------------|----------------------------|------------------------------------------------|----------------------------------------------|
| SF3                   | 1.35 (0.03)                           | 65 (17)                       | 898 (27)                      | 5.3 (0.2)         | 10.5 (0.4)                 | 0.74 (0.03)                | 1.2 (0.2)                                      | 33 (3)                                       |
| SF6                   | 1.37 (0.03)                           | 85 (17)                       | 785 (28)                      | 5.1 (0.2)         | 11.9 (0.6)                 | 0.70 (0.10)                | 2.0 (0.3)                                      | 47 (8)                                       |
| SF10                  | 1.30 (0.04)                           | 60 (18)                       | 873 (31)                      | 5.3 (0.2)         | 9.5 (0.5)                  | 0.73 (0.05)                | 1.3 (0.1)                                      | 32 (3)                                       |
| SF20                  | 1.29 (0.05)                           | 110 (10)                      | 775 (26)                      | 4.9 (0.4)         | 11.4 (0.6)                 | 0.82 (0.07)                | 3.2 (1.1)                                      | 49 (7)                                       |
| SF40                  | 1.29 (0.04)                           | 65 (17)                       | 830 (25)                      | 4.9 (0.3)         | 10.9 (1.3)                 | 0.63 (0.11)                | 1.0 (0.1)                                      | 30 (4)                                       |
| SF70                  | 1.29 (0.04)                           | 90 (13)                       | 790 (15)                      | 4.9 (0.3)         | 11.3 (0.6)                 | 0.89 (0.16)                | 1.6 (0.2)                                      | 30 (3)                                       |
| SFmature              | 1.25 (0.03)                           | 100 (00)                      | 755 (25)                      | 4.4 (0.4)         | 14.7 (1.4)                 | 1.11 (0.04)                | 2.0 (0.1)                                      | 62 (2)                                       |
| CP3                   |                                       | 149 (10)                      | 799 (20)                      | 5.4 (0.1)         | 13.5 (1.4)                 | 0.85 (0.15)                | 4.2 (0.7)                                      | 87 (2)                                       |
| CP10                  |                                       | 100 (13)                      | 819 (12)                      | 5.1 (0.1)         | 11.6 (0.1)                 | 0.80 (0.00)                | 6.5 (1.5)                                      | 67 (6)                                       |
| CP20                  |                                       | 117 (08)                      | 840 (02)                      | 5.5 (0.2)         | 8.9 (1.0)                  | 0.65 (0.05)                | 10.3 (0.8)                                     | 54 (8)                                       |
| CPmature              |                                       | 160 (19)                      | 749 (32)                      | 4.5 (0.1)         | 20.7 (4.1)                 | 1.18 (0.15)                | 17.3 (1.6)                                     | 100 (15)                                     |
| PG6                   | 0.92 (0.03)                           | 750 (10)                      | 58 (08)                       | 5.4 (0.1)         | 19.2 (1.7)                 | 2.36 (0.16)                | 2.9 (0.4)                                      | 213 (16)                                     |
| PG20                  | 1.01 (0.06)                           |                               |                               | 5.5 (0.1)         | 29.0 (4.0)                 | 2.57 (0.35)                | 0.8 (0.1)                                      | 209 (7)                                      |
| PGmature              | 1.02 (0.02)                           | 785 (13)                      | 90 (08)                       | 4.4 (0.1)         | 23.9 (0.4)                 | 2.19 (0.04)                | 1.6 (0.1)                                      | 189 (1)                                      |

16 Means are followed by standard errors in parentheses. Soil analyses for SF and CP the followed  
 17 standard procedures of Embrapa (*Embrapa 1997. Manual de métodos de análise de solo.*  
 18 *Ministério da Agricultura e do Abastecimento, Embrapa, Centro Nacional de Pesquisa de Solos,*  
 19 *Rio de Janeiro, 212p.*) Soil pH was measured in a 1:2.5 water slurry. Total-N concentrations  
 20 were determined by micro-Kjeldahl digestions (SF) or from isotopic analyses with a mass

21 spectrometer (CP). An index of plant-available-P was measured using the Mehlich-I dilute  
22 double acid extraction procedure. Total-P concentrations were determined by digestion in  
23 sulfuric acid and hydrogen peroxide. Concentrations of all P extracts were determined  
24 colorimetrically. Data for PG are from refs 22 and 24.  
25

25 **Table S2.** Foliar analyses of C and N concentrations and isotope ratios at São Francisco do Pará.

| Family          | Species                                               | Forest age | $\delta^{13}\text{C}$<br>(‰) | C<br>(%) | $\delta^{15}\text{N}$<br>(‰) | N<br>(%) |
|-----------------|-------------------------------------------------------|------------|------------------------------|----------|------------------------------|----------|
| Annonaceae      | <i>Guatteria poeppigiana</i>                          | 6          | -33.63                       | 45.97    | -1.62                        | 1.64     |
| Annonaceae      | <i>Rollinia exsucca</i>                               | 6          | -30.61                       | 46.41    | -2.34                        | 1.66     |
| Annonaceae      | <i>Rollinia exsucca</i>                               | 6          | -29.38                       | 45.06    | -4.02                        | 1.62     |
| Annonaceae      | <i>Guatteria poeppigiana</i>                          | 6          | -30.98                       | 46.48    | -1.19                        | 1.56     |
| Annonaceae      | <i>Guatteria poeppigiana</i>                          | 6          | -32.50                       | 45.70    | -1.49                        | 1.68     |
| Annonaceae      | <i>Rollinia exsucca</i>                               | 6          | -30.51                       | 45.64    | -3.06                        | 1.70     |
| Caesalpiniaceae | <i>Sclerolobium paraense</i>                          | 6          | -31.41                       | 48.00    | 1.96                         | 2.81     |
| Dichapetalaceae | <i>Tapura amazonica</i>                               | 6          | -32.68                       | 35.82    | 1.01                         | 1.26     |
| Dichapetalaceae | <i>Tapura amazonica</i>                               | 6          | -30.77                       | 37.23    | 2.61                         | 1.09     |
| Dichapetalaceae | <i>Tapura amazonica</i>                               | 6          | -31.93                       | 36.10    | -0.84                        | 1.18     |
| Euphorbiaceae   | <i>Croton matourensis</i>                             | 6          | -29.08                       | 48.28    | 0.00                         | 1.97     |
| Euphorbiaceae   | <i>Croton matourensis</i>                             | 6          | -28.34                       | 48.49    | 0.20                         | 2.65     |
| Euphorbiaceae   | <i>Mabea speciosa</i>                                 | 6          | -32.48                       | 44.81    | -0.73                        | 1.81     |
| Euphorbiaceae   | <i>Mabea speciosa</i>                                 | 6          | -33.00                       | 46.10    | -1.42                        | 1.72     |
| Fabaceae        | <i>Dipteryx odorata</i>                               | 6          | -29.87                       | 49.24    | 2.07                         | 2.23     |
| Fabaceae        | <i>Dipteryx odorata</i>                               | 6          | -28.93                       | 49.34    | 0.00                         | 2.25     |
| Fabaceae        | <i>Dipteryx odorata</i>                               | 6          | -28.08                       | 49.55    | 2.58                         | 2.46     |
| Fabaceae        | <i>Dipteryx odorata</i>                               | 6          | -28.29                       | 48.73    | 0.88                         | 2.33     |
| Guttiferae      | <i>Vismia guianensis</i>                              | 6          | -31.85                       | 49.53    | -2.07                        | 1.81     |
| Mimosaceae      | <i>Abarema jupunba</i> var. <i>jupunba</i>            | 6          | -28.09                       | 49.04    | 0.70                         | 2.16     |
| Mimosaceae      | <i>Abarema jupunba</i> var. <i>jupunba</i>            | 6          | -31.47                       | 47.99    | -0.21                        | 2.13     |
| Mimosaceae      | <i>Inga flageliformis</i>                             | 6          | -29.53                       | 48.82    | 0.21                         | 2.00     |
| Mimosaceae      | <i>Inga flageliformis</i>                             | 6          | -29.88                       | 48.20    | -0.57                        | 2.63     |
| Mimosaceae      | <i>Inga flageliformis</i>                             | 6          | -28.88                       | 48.17    | -0.29                        | 2.17     |
| Mimosaceae      | <i>Inga flageliformis</i>                             | 6          | -29.71                       | 47.24    | -0.70                        | 2.25     |
| Mimosaceae      | <i>Inga thibaudiana</i>                               | 6          | -30.26                       | 48.61    | 1.21                         | 2.30     |
| Mimosaceae      | <i>Inga rubiginosa</i>                                | 6          | -29.32                       | 45.19    | -0.08                        | 2.30     |
| Mimosaceae      | <i>Inga thibaudiana</i>                               | 6          | -31.11                       | 46.89    | -0.36                        | 2.08     |
| Mimosaceae      | <i>Inga thibaudiana</i>                               | 6          | -30.39                       | 46.55    | -0.88                        | 1.99     |
| Mimosaceae      | <i>Inga thibaudiana</i>                               | 6          | -30.87                       | 48.23    | 0.51                         | 2.28     |
| Myrtaceae       | <i>Myrcia cuprea</i>                                  | 6          | -33.66                       | 42.33    | -0.24                        | 1.17     |
| Myrtaceae       | <i>Myrcia cuprea</i>                                  | 6          | -33.20                       | 43.08    | -1.87                        | 1.16     |
| Anacardiaceae   | <i>Tapirira guianensis</i>                            | 20         | -32.19                       | 46.51    | 2.22                         | 1.85     |
| Anacardiaceae   | <i>Tapirira guianensis</i>                            | 20         | -32.10                       | 45.82    | 2.62                         | 1.68     |
| Annonaceae      | <i>Guatteria poeppigiana</i>                          | 20         | -31.49                       | 47.63    | -1.18                        | 1.59     |
| Annonaceae      | <i>Guatteria poeppigiana</i>                          | 20         | -33.39                       | 44.33    | 2.25                         | 1.64     |
| Annonaceae      | <i>Guatteria poeppigiana</i>                          | 20         | -33.18                       | 44.31    | 2.64                         | 1.83     |
| Connaraceae     | <i>Connarus perrottetii</i> var. <i>angustifolius</i> | 20         | -31.76                       | 52.87    | 2.05                         | 1.49     |
| Connaraceae     | <i>Connarus perrottetii</i> var. <i>angustifolius</i> | 20         | -32.04                       | 50.90    | 1.99                         | 1.29     |
| Connaraceae     | <i>Connarus perrottetii</i> var. <i>angustifolius</i> | 20         | -30.58                       | 49.35    | 1.12                         | 1.28     |
| Euphorbiaceae   | <i>Croton matourensis</i>                             | 20         | -30.70                       | 45.59    | 2.51                         | 2.53     |
| Euphorbiaceae   | <i>Croton matourensis</i>                             | 20         | -28.70                       | 45.83    | 1.57                         | 2.83     |
| Euphorbiaceae   | <i>Croton matourensis</i>                             | 20         | -29.30                       | 46.02    | 2.28                         | 2.70     |

|                 |                                     |        |        |       |       |      |
|-----------------|-------------------------------------|--------|--------|-------|-------|------|
| Guttiferae      | <i>Vismia guianensis</i>            | 20     | -30.90 | 49.92 | -1.88 | 1.56 |
| Guttiferae      | <i>Vismia guianensis</i>            | 20     | -30.71 | 48.52 | -1.16 | 1.68 |
| Guttiferae      | <i>Vismia guianensis</i>            | 20     | -32.19 | 40.19 | 0.77  | 1.58 |
| Lauraceae       | <i>Ocotea guianensis</i>            | 20     | -29.73 | 48.28 | -1.98 | 1.30 |
| Lauraceae       | <i>Ocotea guianensis</i>            | 20     | -30.29 | 48.00 | -4.10 | 1.41 |
| Lauraceae       | <i>Ocotea guianensis</i>            | 20     | -30.44 | 50.03 | 2.00  | 1.77 |
| Lecythidaceae   | <i>Lecythis lurida</i>              | 20     | -31.09 | 46.72 | 2.95  | 2.16 |
| Lecythidaceae   | <i>Lecythis lurida</i>              | 20     | -29.90 | 49.39 | 2.21  | 2.23 |
| Mimosaceae      | <i>Inga flageliformis</i>           | 20     | -30.16 | 45.23 | 0.10  | 2.39 |
| Mimosaceae      | <i>Inga flageliformis</i>           | 20     | -30.39 | 47.71 | -0.18 | 2.04 |
| Mimosaceae      | <i>Inga stipularis</i>              | 20     | -32.47 | 48.79 | 0.63  | 2.05 |
| Mimosaceae      | <i>Inga thibaudiana</i>             | 20     | -31.92 | 46.49 | -0.23 | 2.54 |
| Mimosaceae      | <i>Inga thibaudiana</i>             | 20     | -31.03 | 46.84 | 0.12  | 2.34 |
| Mimosaceae      | <i>Inga thibaudiana</i>             | 20     | -32.08 | 46.49 | -0.49 | 2.30 |
| Mimosaceae      | <i>Inga flageliformis</i>           | 20     | -30.21 | 46.25 | 0.08  | 2.20 |
| Mimosaceae      | <i>Inga thibaudiana</i>             | 20     | -33.19 | 47.35 | 1.70  | 3.18 |
| Moraceae        | <i>Maquira guianensis</i>           | 20     | -32.19 | 41.77 | 2.16  | 2.13 |
| Myrtaceae       | <i>Myrcia cuprea</i>                | 20     | -33.33 | 44.20 | 2.13  | 1.44 |
| Annonaceae      | <i>Guatteria schomburgkiana</i>     | 40     | -32.48 | 45.58 | 1.62  | 2.12 |
| Apocynaceae     | <i>Ambelania acida</i>              | 40     | -32.14 | 52.36 | 1.73  | 1.17 |
| Apocynaceae     | <i>Ambelania acida</i>              | 40     | -32.39 | 51.44 | 2.05  | 1.05 |
| Burseraceae     | <i>Protium subserratum</i>          | 40     | -33.94 | 46.79 | 0.28  | 1.65 |
| Caesalpiniaceae | <i>Hymenaea parvifolia</i>          | 40     | -30.44 | 49.51 | 0.06  | 1.91 |
| Caesalpiniaceae | <i>Hymenaea parvifolia</i>          | 40     | -31.05 | 49.37 | -0.02 | 1.93 |
| Caesalpiniaceae | <i>Chamaecrista bahiae</i>          | 40     | -31.14 | 50.60 | 1.80  | 2.41 |
| Caesalpiniaceae | <i>Chamaecrista bahiae</i>          | 40     | -31.07 | 50.04 | -0.56 | 2.65 |
| Caesalpiniaceae | <i>Chamaecrista bahiae</i>          | 40     | -31.10 | 49.94 | 0.53  | 2.53 |
| Caesalpiniaceae | <i>Chamaecrista bahiae</i>          | 40     | -30.66 | 48.37 | -0.19 | 2.24 |
| Euphorbiaceae   | <i>Croton matourensis</i>           | 40     | -27.06 | 49.28 | 0.89  | 3.01 |
| Euphorbiaceae   | <i>Croton matourensis</i>           | 40     | -29.79 | 47.68 | 1.25  | 2.95 |
| Fabaceae        | <i>Swartzia arborescens</i>         | 40     | -30.92 | 47.85 | 1.57  | 3.21 |
| Lacistemaceae   | <i>Lacistema pubescens</i>          | 40     | -31.96 | 49.30 | 0.96  | 2.12 |
| Lacistemaceae   | <i>Lacistema pubescens</i>          | 40     | -32.61 | 47.11 | 1.94  | 2.40 |
| Lauraceae       | <i>Ocotea guianensis</i>            | 40     | -29.34 | 48.84 | -0.29 | 1.63 |
| Lecythidaceae   | <i>Lecythis lurida</i>              | 40     | -30.56 | 48.99 | 2.45  | 2.83 |
| Lecythidaceae   | <i>Lecythis lurida</i>              | 40     | -31.35 | 49.72 | 4.18  | 2.87 |
| Mimosaceae      | <i>Inga auristellae</i>             | 40     | -32.87 | 47.12 | 1.76  | 2.54 |
| Mimosaceae      | <i>Inga gracilifolia</i>            | 40     | -30.20 | 46.89 | 1.17  | 3.10 |
| Mimosaceae      | <i>Inga rubiginosa</i>              | 40     | -30.28 | 47.62 | 2.83  | 2.79 |
| Mimosaceae      | <i>Inga rubiginosa</i>              | 40     | -30.14 | 47.98 | 1.21  | 2.65 |
| Mimosaceae      | <i>Stryphnodendron pulcherrimum</i> | 40     | -27.73 | 47.36 | 2.94  | 4.23 |
| Myrtaceae       | <i>Myrcia fallax</i>                | 40     | -33.57 | 45.36 | -1.16 | 1.43 |
| Myrtaceae       | <i>Myrcia fallax</i>                | 40     | -33.73 | 45.15 | -0.09 | 1.47 |
| Anacardiaceae   | <i>Tapirira guianensis</i>          | mature | -29.57 | 45.65 | 1.14  | 2.11 |
| Anacardiaceae   | <i>Tapirira guianensis</i>          | mature | -29.07 | 45.38 | 1.43  | 2.10 |
| Annonaceae      | <i>Guatteria poeppigiana</i>        | mature | -31.04 | 47.89 | 2.11  | 1.87 |
| Apocynaceae     | <i>Lacmellia aculeata</i>           | mature | -33.56 | 47.68 | 1.08  | 1.54 |
| Bignoniaceae    | <i>Jacaranda copaia</i>             | mature | -31.94 | 48.18 | 1.41  | 2.47 |

|                |                                     |        |        |       |      |      |
|----------------|-------------------------------------|--------|--------|-------|------|------|
| Burseraceae    | <i>Protium pallidum</i>             | mature | -29.16 | 44.51 | 0.76 | 1.31 |
| Buseraceae     | <i>Protium tenulfolium</i>          | mature | -31.63 | 49.08 | 1.27 | 1.80 |
| Cecropiaceae   | <i>Pourouma velutina</i>            | mature | -30.93 | 45.56 | 2.10 | 2.73 |
| Flacourtiaceae | <i>Laetia procera</i>               | mature | -28.29 | 50.14 | 1.72 | 3.04 |
| Flacourtiaceae | <i>Laetia procera</i>               | mature | -28.86 | 50.77 | 2.55 | 2.95 |
| Guttiferae     | <i>Vismia guianensis</i>            | mature | -32.59 | 48.48 | 2.56 | 1.67 |
| Mimosaceae     | <i>Inga thibaudiana</i>             | mature | -32.17 | 48.44 | 3.42 | 2.95 |
| Mimosaceae     | <i>Pseudopiptadenia suaveolens</i>  | mature | -32.40 | 48.85 | 3.11 | 2.83 |
| Mimosaceae     | <i>Stryphnodendron pulcherrimum</i> | mature | -30.57 | 49.06 | 2.72 | 3.40 |
| Mimosaceae     | <i>Abarema jupunba var. jupunba</i> | mature | -33.92 | 48.92 | 1.83 | 2.91 |
| Mimosaceae     | <i>Abarema jupunba var. jupunba</i> | mature | -32.64 | 48.74 | 1.30 | 2.99 |
| Mimosaceae     | <i>Inga alba</i>                    | mature | -32.16 | 50.55 | 2.43 | 3.73 |
| Mimosaceae     | <i>Inga alba</i>                    | mature | -32.18 | 50.46 | 2.58 | 3.34 |
| Mimosaceae     | <i>Inga alba</i>                    | mature | -34.70 | 48.43 | 4.59 | 3.21 |
| Mimosaceae     | <i>Inga thibaudiana</i>             | mature | -33.81 | 49.11 | 3.11 | 3.27 |
| Sapotaceae     | <i>Pouteria oblanceolata</i>        | mature | -29.10 | 49.63 | 2.17 | 1.84 |
| Tiliaceae      | <i>Apeiba burchellii</i>            | mature | -29.91 | 45.98 | 2.15 | 2.04 |
| Tiliaceae      | <i>Apeiba burchellii</i>            | mature | -29.36 | 46.02 | 2.56 | 2.08 |
| Tiliaceae      | <i>Apeiba burchellii</i>            | mature | -33.15 | 44.35 | 1.22 | 2.55 |

26

27 Analysis of variance shows that there was no difference in foliar  $^{15}\text{N}$  enrichments between  
 28 legume and non-legume species ( $p = 0.19$ ), although leguminous species had significantly higher  
 29 foliar N concentrations ( $p = .0001$ ) and significantly lower C:N ratios ( $p = 0.0001$ ).

30

30 **Table S3.** P-values of site (chronosequence) and forest age effects in analyses of variance  
 31 (ANOVA). To address uncertainty in the ages of the mature forests, three approaches were used.  
 32 One ANOVA was conducted with data from all forest ages, using rankings of 1-7 for the 3, 6,  
 33 10, 20, 40, and 70 year-old forests and mature forests, respectively. A second ANOVA was  
 34 conducted on all data, using the logarithm of forest age as a continuous variable and  
 35 conservatively assuming an age of 200 years for the mature forests. A third ANOVA omitted the  
 36 data of the mature forests, and used the logarithm of known forest ages as a continuous variable  
 37 for all secondary forests only. P-values  $\leq 0.05$  are in bold font.

38

| Dependent variable                 | ----- All data -----    |                  |                     |                  | Mature forests excluded |                  |
|------------------------------------|-------------------------|------------------|---------------------|------------------|-------------------------|------------------|
|                                    | ----- age as rank ----- |                  | ----- log age ----- |                  | ----- log age -----     |                  |
|                                    | site effect             | age rank effect  | site effect         | log age effect   | site effect             | log age effect   |
| foliar $^{15}\text{N}$             | <b>&lt;0.001</b>        | <b>&lt;0.001</b> | <b>&lt;0.001</b>    | <b>&lt;0.001</b> | <b>0.002</b>            | <b>0.021</b>     |
| foliar N conc.                     | 0.081                   | <b>0.007</b>     | 0.078               | <b>0.006</b>     | 0.255                   | <b>0.037</b>     |
| litterfall mass:N                  | <b>0.004</b>            | <b>&lt;0.001</b> | <b>0.002</b>        | <b>&lt;0.001</b> | <b>0.003</b>            | <b>&lt;0.001</b> |
| litterfall N:P                     | <b>&lt;0.001</b>        | <b>&lt;0.001</b> | <b>&lt;0.001</b>    | <b>&lt;0.001</b> | <b>&lt;0.001</b>        | <b>0.014</b>     |
| soil $\text{NO}_3^-$               | 0.117                   | <b>&lt;0.001</b> | 0.151               | <b>0.002</b>     | <b>0.037</b>            | <b>0.025</b>     |
| soil $\text{NO}_3^-:\text{NH}_4^+$ | 0.071                   | <b>0.005</b>     | 0.072               | <b>0.005</b>     | 0.210                   | 0.057            |
| nitrous oxide                      | <b>0.048</b>            | <b>0.022</b>     | 0.052               | <b>0.031</b>     | 0.243                   | 0.119            |

39
